# Supplementary material
Source: PubMed Central journal article supplement (PMC4366635)

**Table S1.** Identification of potential off-target events.

| Location | Start to end                                  | Target gene            | Genes<br>upstream/downstream | Binding sequence <sup>a</sup>          | No. of<br>mismatches | Primers for<br>sequencing | Primer sequence                             | Mutation |
|----------|-----------------------------------------------|------------------------|------------------------------|----------------------------------------|----------------------|---------------------------|---------------------------------------------|----------|
| chrX     | 143201730~143201767 or<br>142894820~142894857 | F8 intron or<br>No     | FUNDC2/DKC1 or<br>CLIC2/VBP1 | TGcCCTGcCCcGCCGCCTACGGGgAGcCcCTGCAGGCC | 6                    | off1-F/R                  | gtcga gcaagctgaa gaaage/ctgcatgcgcgtgaa gac | ND       |
| chr3     | 99610680~99610717                             | No                     | EPCAM/SOCS5                  | AGCCTGggGtGCCcTCCCCTAAGCGGCaGGCCAGGgCA | 6                    | off2-F/R                  | ccactgctgttaccacgtca/gatctgggggtggaca gtta  | ND       |
| chr3     | 41635838~41635874                             | IGFACS                 | NUBP2/MRPS34                 | CGgCCTGGCCAGCCtgGAGCCGcAGGCGCTGcIGGgC  | 6                    | off3-F/R                  | acgacgactacacggacga/gctgcaggta ggtcagcttg   | ND       |
| chr5     | 15812400~15812436 or<br>15728736~15728772     | No                     | TUBA1B/AQP6                  | GGCCgGgAGgGCCTTgGGGAGGgGcCTGGCCAGGACG  | 6                    | off4-F/R                  | ataccattggtgggagtga/agtcaaaatggcccctctct    | ND       |
| chr8     | 33353489~33353525                             | No                     | CHRNA9/UCHL1                 | GaaCTGCAGCtCaTTCAGCTTGcTcCaGGCCAGGACC  | 6                    | off5-F/R                  | ctgggtgttccagtgcctct/actcctccccttagctctgc   | ND       |
| chr14    | 152907141~152907178                           | No                     | GLRX3/MIR202                 | CGgCTGCAGCGaCgTCCAGGAGGcTGTGcCCAGGgCG  | 6                    | off6-F/R                  | gctcgtgtgccctgagac/gtctggagaccatccaaggag    | ND       |
| chr18    | 7180238~7180274                               | No                     | NOS3/TRY                     | GGTCCTGGCCAGaCcCCGAAAcAAGGaGCTGCAatCT  | 6                    | off7-F/R                  | cagggatcaaacccacattc/gggcagggtccagagatatga  | ND       |
| chr9     | 150358911~150358947                           | <i>GRB10</i><br>intron | DDC                          | GGgCggGGaCAGCCGCCCAAGAcGGCGCTcCAGGCC   | 6                    | off8-F/R                  | gtcctctaa gccagcgtgtc/ccgtgcaatattgggacata  | ND       |

<sup>a</sup> Lower-case letters denote the mismatched nucleotides with the ZFN target site.

**Table S2.** Optimization of transfection conditions using different amounts of ZFN mRNA or plasmids.

| Type of ZFN | Cell Viability | Amount of ZFN <sup>a</sup> | Efficiency of Gene Editing <sup>b</sup> |
|-------------|----------------|----------------------------|-----------------------------------------|
| mRNA        | little         | 4 $\mu$ g                  | 0                                       |
| mRNA        | little         | 2 $\mu$ g                  | 0                                       |
| plasmid     | little         | 4 $\mu$ g                  | 1.2%                                    |
| plasmid     | little         | 3 $\mu$ g                  | 0                                       |
| plasmid     | little         | 2 $\mu$ g                  | 2.6%                                    |
| plasmid     | little         | 1 $\mu$ g                  | 1.8%                                    |
| plasmid     | normal         | 0.5 $\mu$ g                | 11.8%                                   |
| plasmid     | normal         | 0.3 $\mu$ g                | 0                                       |

<sup>a</sup> The amount denotes each ZFN construct used for transfection in the ZFN set pair.

<sup>b</sup> One hundred colonies were chosen for sequencing, and ZFN-mediated gene editing efficiency was calculated as the number of mutant colonies divided by the total colonies.

**Table S3.** Summary of the cloning and generation of *PKDI*<sup>+/-</sup> pigs.

| Cell line | Recipient | Pregnant | Live Birth | Stillbirth | Genotype                                           |
|-----------|-----------|----------|------------|------------|----------------------------------------------------|
| 96        | 3         | 2        | 10         | 2          | <i>PKDI</i> <sup>TGCT ins/+</sup> (6) <sup>a</sup> |
| 63        | 3         | 1        | 7          | 0          | <i>PKDI</i> <sup>T ins/+</sup> (6)                 |
| 60        | 3         | 1        | 1          | 2          | <i>PKDI</i> <sup>TGCT ins/+</sup> (1)              |
| 77        | 4         | 1        | 2          | 1          | <i>PKDI</i> <sup>+/+</sup> <sup>b</sup>            |
| Total     | 13        | 5        | 20         | 5          |                                                    |

<sup>a</sup> Parenthesed number indicates the number of mutant pigs. <sup>b</sup> Cell line 77 only gave rise to WT piglets rather than piglets with compound heterozygous *PKDI*.

**Table S4.** The *PKDI* mutant alleles can be passed through germline transmission.

| Genotype of F0 pigs                         | Identification No. of F0 pigs | Identification No. of sows | Number of live birth | Number of mutant F1 piglets | Number of WT F1 piglets |
|---------------------------------------------|-------------------------------|----------------------------|----------------------|-----------------------------|-------------------------|
| <i>PKDI</i> <sup>TGCT</sup><br><i>ins/+</i> | 436                           | 353                        | 7                    | 4                           | 3                       |
|                                             | 436                           | 343                        | 4                    | 2                           | 2                       |
|                                             | 435                           | 366                        | 8                    | 5                           | 3                       |
|                                             | 436                           | 166                        | 5                    | 3                           | 2                       |
|                                             | 491                           | 288                        | 10                   | 1                           | 9                       |
|                                             | 436                           | 293                        | 7                    | 3                           | 4                       |
|                                             |                               | Total                      |                      | 41                          | 18                      |
| <i>PKDI</i> <sup>T ins/+</sup>              | 488                           | 152                        | 9                    | 7                           | 2                       |
|                                             | 488                           | 265                        | 7                    | 6                           | 1                       |
|                                             | 487                           | 333                        | 7                    | 4                           | 3                       |
|                                             |                               | Total                      |                      | 23                          | 17                      |

**Table S5.** CT analysis of 11-month-old PKD1+/- pigs.

| Id. No.                                     | Number of cysts with designated diameter (mm) in right kidneys |     |     |      |     | Number of cysts with designated diameter (mm) in left kidneys |     |     |      |     |
|---------------------------------------------|----------------------------------------------------------------|-----|-----|------|-----|---------------------------------------------------------------|-----|-----|------|-----|
|                                             | 1.5-3                                                          | 3-5 | 5-7 | 7-10 | >10 | 1.5-3                                                         | 3-5 | 5-7 | 7-10 | >10 |
| <i>PKDI</i> <sup>TGCT</sup><br><i>ins/+</i> |                                                                |     |     |      |     |                                                               |     |     |      |     |
| 434                                         | 1                                                              | 3   | 2   | 1    | 2   | 1                                                             | 3   | 2   | 2    | 0   |
| 435                                         | 2                                                              | 0   | 2   | 0    | 0   | 1                                                             | 2   | 0   | 0    | 0   |
| 436                                         | 2                                                              | 2   | 2   | 1    | 1   | 1                                                             | 4   | 2   | 4    | 4   |
| 463                                         | 0                                                              | 4   | 2   | 2    | 5   | 0                                                             | 3   | 1   | 3    | 2   |
| 491                                         | 0                                                              | 3   | 1   | 0    | 2   | 0                                                             | 2   | 1   | 0    | 0   |
| <i>PKDI</i> <sup>T ins/+</sup>              |                                                                |     |     |      |     |                                                               |     |     |      |     |
| 487                                         | 4                                                              | 1   | 1   | 2    | 0   | 4                                                             | 0   | 1   | 0    | 0   |
| 488                                         | 1                                                              | 5   | 2   | 1    | 1   | 1                                                             | 3   | 0   | 2    | 0   |
| 490                                         | 0                                                              | 0   | 0   | 0    | 1   | 3                                                             | 0   | 4   | 0    | 1   |

**Supplementary Figure S1.** Construction and characterization of *PKDI*<sup>+/-</sup> pigs. (A) Schematic diagram of the ~1.9 kb neomycin resistance cassette digested from plasmid pL452 by *Bam*HI and *Eco*RI. (B) Schematic representations of WT and mutant *PKDI* gene reading frames and the predicted structure of truncated PC1 produced by mutant *PKDI* alleles. The blue arrows indicate the reading frames. The truncated PC1 fragment only preserves the signal peptide (blue box) and the LRR domain (purple box), which can be recognized by the 7e12 anti-PC1 antibody. (C) qRT-PCR analysis of 5' part of *PKDI* expression (mean ± SEM) in neonatal pig ear biopsies, showing that *PKDI*<sup>TGCT ins/+</sup> (n=6) and *PKDI*<sup>T ins/+</sup> (n=5) pigs had a reduced *PKDI* expression compared to WT pigs (n=6, \* P<0.05). (D) qRT-PCR of 5' part of *PKDI* expression in neonatal kidneys, which also shows a reduction of *PKDI* in *PKDI*<sup>+/-</sup> pigs. Data obtained from three replicated experiments are presented as the mean ± SD. (E) Cyst diameters, determined by CT, increased with the age (P=0.0002). Black dots and red triangles indicate cysts in 11- and 18-month-old kidneys from three *PKDI*<sup>+/-</sup> pigs, respectively. The same cysts at the two stages are connected by dotted lines. (F) Kidney volumes, adjusted by the body weight of each pig, were determined by 3D reconstruction of CT results. The kidney volumes of each pig represent the mean value of both kidneys. Data are shown as mean ± SEM. (n=5 for *PKDI*<sup>+/+</sup> pigs, n=5 for *PKDI*<sup>TGCT ins/+</sup>, n=3 for *PKDI*<sup>T ins/+</sup>, n=8 for *PKDI*<sup>+/-</sup> pigs).

**A**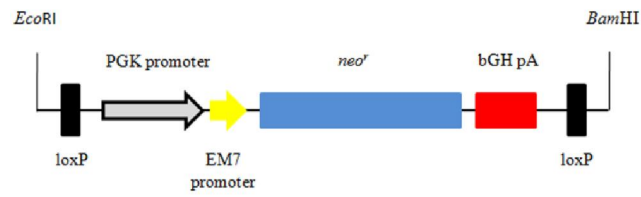**B**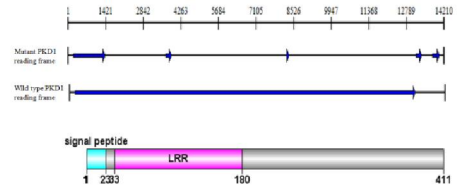**C**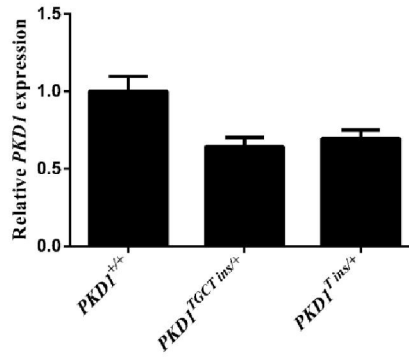**D**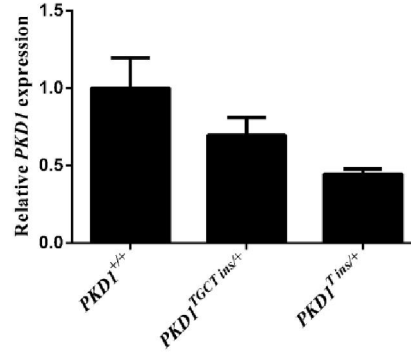**E**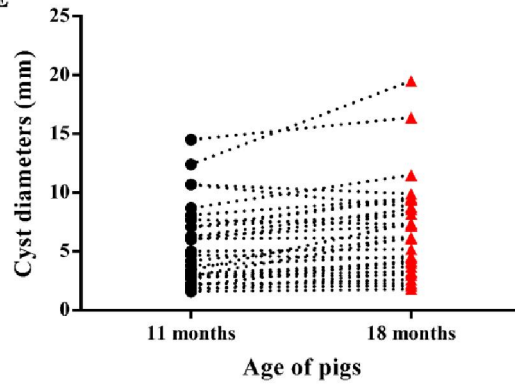**F**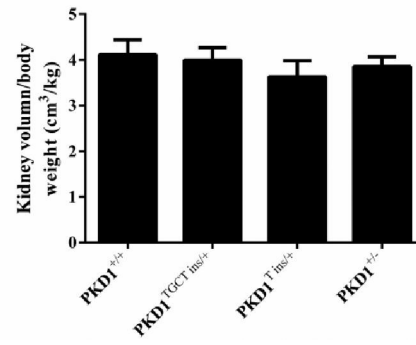

**Supplementary Figure 2.** (A) The upper three panels are the representative histological images of pig kidneys at lower magnification. The lower panel shows the gross morphology of F1 piglet kidneys. The arrows indicate the renal cysts in KO pig kidneys. (B) The morphometric analysis of cyst index of pig kidneys.



**A**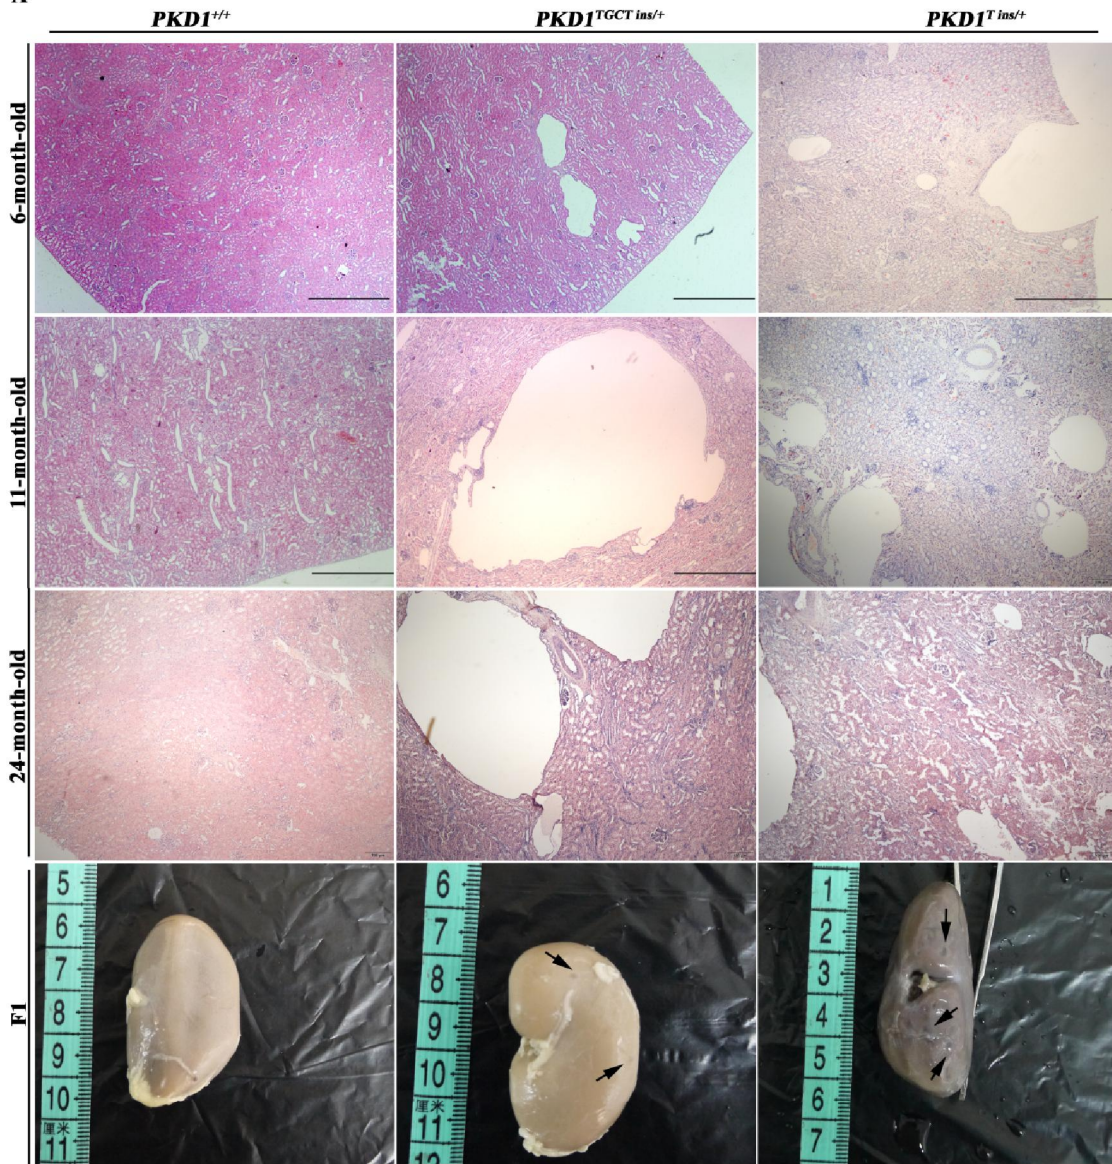**B**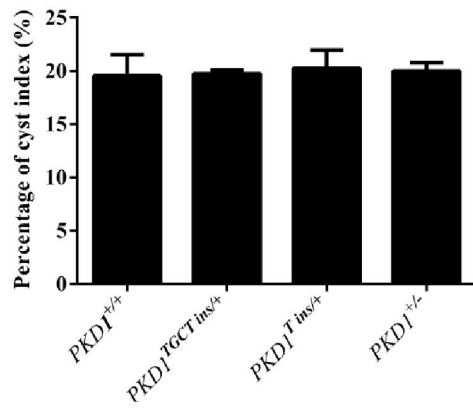

Supplement: ijbsv11p0361s1.pdf [file ijbsv11p0361s1.pdf]
